# Supplementary material for: Candidate Gene Association Studies of Anthracycline-induced Cardiotoxicity: A Systematic Review and Meta-analysis
Source: PubMed Central journal article supplement (PMC5428315; doi:10.1038/s41598-017-00075-1), 2017-02-27
Supplement: 41598_2017_75_MOESM1_ESM.pdf [file 41598_2017_75_MOESM1_ESM.pdf]

**Title Page**

**Title:** Candidate Gene Association Studies of Anthracycline-induced Cardiotoxicity: A Systematic Review and Meta-analysis.

**Authors:** Siew Lian Leong<sup>1,2</sup>, Nathorn Chaiyakunapruk<sup>1,3,4,5</sup>, Shaun Wen Huey Lee<sup>1\*</sup>

## Supplementary Information

### Search Strategies

*Complete list of search terms used.*

**Supplementary Table 1:** Definition of cardiotoxicity used by included studies. *This table summarised the various definition for cardiotoxicity used in the included studies.*  
(Words)

**Supplementary Table 2:** The quality assessment of reporting in each study (N = 27). *Each study was scored independently by 2 reviewers according the 11 items in Q-Genie tool. The average score of each item and total average score for each study were summarised in this table.* (Words)

**Supplementary Table 3:** Genetic polymorphisms, association with ACT and HWE status. *This table summarised the findings on the association between each of the 147 SNPs in 84 genes and anthracycline-induced cardiotoxicity.*  
(Words)

## Search Strategies

### 1. OVID Medline, Cochrane Central Register of Controlled Studies, EMBASE and AMED Text word search

(1) anthracycline\*.mp.; (2) doxorubicin\*.mp.; (3) daunorubicin\*.mp. (4) epirubicin\*.mp. (5) idarubicin\*.mp. (6) 1 or 2 or 3 or 4 or 5; (7) cardiotoxicity\*.mp.; (8) cardiomyopathy\*.mp.; (9) heart\*.mp.; (10) failure\*.mp.; (11) 9 and 10; (12) arrhythmia\*.mp.; (13) 7 or 8 or 11 or 12; (14) genetic\*.mp.; (15) polymorphism\*.mp.; (16) pharmacogenomics\*.mp.; (17) variant\*.mp. (18) 14 or 15 or 16 or 17; (19) 6 and 13 and 18

### 2. PUBMED Text word Search

(1) anthracycline or doxorubicin or daunorubicin or epirubicin or idarubicin; (2) heart and failure; (3) 2 or cardiotoxicity or cardiomyopathy or arrhythmia; (4) genetic or pharmacogenomics or variant or polymorphism (5) 1 and 3 and 4

### 3. CINAHL Plus Text word search

(1) anthracycline or doxorubicin or daunorubicin or epirubicin or idarubicin; (2) cardiotoxicity or cardiomyopathy or arrhythmia or heart failure; (3) genetic or pharmacogenomics or variant or polymorphism; (4) 1 and 2 and 3

### 4. HuGE Navigator Text word search

anthracycline and cardiotoxicity and genetic

**Supplementary Table 1: Definition of cardiotoxicity used by included studies.**

| <b>Studies</b>       | <b>Definition</b>                                                                                                                                                                                                                                                                |
|----------------------|----------------------------------------------------------------------------------------------------------------------------------------------------------------------------------------------------------------------------------------------------------------------------------|
| Wojnowski, 2005      | arrhythmia in the absence of arrhythmia before treatment <i>or</i> myocarditis-pericarditis <i>or</i> acute heart failure <i>or</i> LVEF <50% <i>or</i> SF <25%                                                                                                                  |
| Weiss, 2006          | SWOG toxicity criteria for SWOG 9031 <i>or</i> CTCAEv2.0 for SWOG-9333.                                                                                                                                                                                                          |
| Blanco, 2008         | Self-reporting of signs and symptoms of CHF and use of medication for CHF management.                                                                                                                                                                                            |
| Rajic, 2009          | Clear conduction disturbances, depolarization and repolarization changes in ECG <i>or</i> SF < 30%, <i>or</i> LVEF <54% <i>or</i> derangement of (reference range) E (0.75±0.13), A (0.51±0.11), E/A (1.53±0.4), IVRT (67±8), PV-A (0.21±0.08), PV-D (0.47±0.11) PV-S (0.44±0.1) |
| Rossi, 2009          | Grade 2-4 cardiotoxicity according to CTCAEv 0.3                                                                                                                                                                                                                                 |
| Blanco, 2012         | Signs and symptoms of cardiac compromise based on AHA criteria 2005 <i>or</i> absence of symptoms/signs with echo evidence of left ventricular dysfunction (EF ≤ 40% and/or SF ≤ 28%).                                                                                           |
| Kitagawa, 2012       | QTc interval prolongation <i>or</i> other toxic effects based on CTCAEv3                                                                                                                                                                                                         |
| Lubieniecka, 2012    | Percentage drops in LVEF.                                                                                                                                                                                                                                                        |
| Semsei, 2012         | Changes in LVFS                                                                                                                                                                                                                                                                  |
| Visscher, 2012       | SF ≤ 26% <i>or</i> sign and symptoms requiring for cardiac compromise intervention based on CTCAEv3                                                                                                                                                                              |
| Volkan-Salanci, 2012 | LVEF decrease > 10% <i>or</i> LVEF ≤ 50%                                                                                                                                                                                                                                         |
| Windsor, 2012        | Decrease in LVEF by ≥ 1 CTCAEv3 grade.                                                                                                                                                                                                                                           |
| Armenian, 2013       | Sign and symptoms of cardiac compromise requiring intervention based AHA criteria 2005                                                                                                                                                                                           |
| Lipshultz, 2013      | cTnT > 0.01 ng/mL <i>or</i> NT-proBNP > 150 pg/mL (< 1 year old) <i>or</i> NT-proBNP > 100 pg/mL (≥ 1 year old)                                                                                                                                                                  |
| Lubieniecka, 2013    | Percentage drop in LVEF                                                                                                                                                                                                                                                          |
| Visscher, 2013       | SF ≤ 26% <i>or</i> sign and symptoms of cardiac compromise requiring intervention based on CTCAEv3                                                                                                                                                                               |
| Vivenza, 2013        | Overt CHF (grade III) based on CTCAEv2 <i>or</i> LVEF < 50% (grade II) based on CTCAEv2                                                                                                                                                                                          |
| Wang, 2014           | AHA criteria for cardiac compromise i.e. symptoms and/or signs of cardiac compromise and echo evidence of LV dysfunction <i>or</i> absence of symptoms/signs with echo evidence of LV dysfunction (LVEF ≤ 40% and/or SF ≤ 28%).                                                  |
| Wasielewski, 2014    | Signs and symptoms of cardiac compromise based AHA criteria <i>or</i> echo evidence of LV dysfunction <i>or</i> absence of symptoms/signs with echo evidence of LV dysfunction (LVEF ≤ 40% and/or SF ≤ 28%).                                                                     |
| Aminkeng, 2015       | LVEF < 45% <i>or</i> dilation of LV-end-diastolic dimension >117%.                                                                                                                                                                                                               |
| Krajinovic, 2015     | Reduction in SF and EF                                                                                                                                                                                                                                                           |
| Reichwagen, 2015     | Grade >0 based on CTCAEv2                                                                                                                                                                                                                                                        |
| Visscher, 2015       | SF <26% <i>or</i> echo and/or symptoms of cardiac compromise requiring intervention based on CTCAEv3                                                                                                                                                                             |
| Vulsteke, 2015       | Asymptomatic decrease of LVEF>10%                                                                                                                                                                                                                                                |
| Hertz, 2016          | EF<55%                                                                                                                                                                                                                                                                           |
| Reinbolt, 2016       | EF <50% <i>or</i> decrease of LVEF>15% <i>or</i> new arrhythmia <i>or</i> new myocardial infarction                                                                                                                                                                              |
| Wang, 2016           | Signs and symptoms of cardiac compromise based on AHA criteria 2009 <i>or</i> absence of symptoms/signs with echo evidence of LV dysfunction (LVEF ≤ 40% and/or SF ≤ 28%).                                                                                                       |

Sachidanandam, 2012 did not report the definition of cardiotoxicity used.

Abbreviation: AHA, American Heart Association; CHF, congestive heart failure; ECG, electrocardiogram; EF, ejection fraction; LV, left ventricular; LVEF, left ventricular ejection fraction; LVFS, left ventricular shortening fraction; CTCAE, National Cancer Institute Common Toxicity Criteria; SF, shortening fraction; SWOG, Southwest Oncology Group

**Supplementary Table 2: The quality assessment of reporting in each study (N = 27<sup>1</sup>).**

| Study<br>Item              | 1    | 2    | 3    | 4  | 5  | 6   | 7    | 8    | 9   | 10   | 11   | 12 | 13  | 14   |
|----------------------------|------|------|------|----|----|-----|------|------|-----|------|------|----|-----|------|
| <b>A</b>                   | 6    | 5.5  | 5    | 7  | 7  | 6   | 6    | 6    | 6.5 | 4.5  | 6    | 6  | 6   | 6    |
| <b>B</b>                   | 5.5  | 5    | 5    | 7  | 6  | 7   | 6    | 5    | 5.5 | 5    | 5    | 6  | 6   | 5    |
| <b>C</b>                   | 5.5  | 4    | 5.5  | 5  | 3  | 6.5 | 0    | 0    | 0   | 5    | 0    | 4  | 7   | 5    |
| <b>D</b>                   | 5    | 5    | 5    | 6  | 6  | 5   | 6    | 5    | 5.5 | 4.5  | 4.5  | 6  | 5   | 5.5  |
| <b>E</b>                   | 5    | 4.5  | 4.5  | 2  | 4  | 4.5 | 4    | 3    | 5   | 3.5  | 3.5  | 7  | 4.5 | 3.5  |
| <b>F</b>                   | 4    | 3    | 4    | 2  | 5  | 4   | 3.5  | 3.5  | 4   | 3.5  | 3.5  | 6  | 5   | 3.5  |
| <b>G</b>                   | 3    | 3.5  | 2.5  | 1  | 7  | 3   | 2.5  | 3    | 3   | 3    | 2.5  | 1  | 2.5 | 6    |
| <b>H</b>                   | 5    | 4.5  | 4.5  | 4  | 7  | 5   | 4    | 3    | 5.5 | 5    | 5    | 6  | 5   | 6    |
| <b>I</b>                   | 6    | 4.5  | 5.5  | 4  | 7  | 6   | 3    | 2.5  | 6   | 4.5  | 5    | 6  | 5   | 5    |
| <b>J</b>                   | 3.5  | 4    | 4    | 5  | 4  | 4   | 3.5  | 3    | 3.5 | 4    | 3.5  | 6  | 4   | 4    |
| <b>K</b>                   | 6    | 5    | 4    | 5  | 6  | 6   | 4    | 4.5  | 5.5 | 5    | 5    | 6  | 5   | 4    |
| <b>Total scoring</b>       | 54.5 | 48.5 | 49.5 | 48 | 62 | 57  | 42.5 | 38.5 | 50  | 47.5 | 43.5 | 60 | 55  | 53.5 |
| <b>Quality<sup>1</sup></b> | G    | G    | G    | G  | G  | G   | G    | M    | G   | G    | G    | G  | G   | G    |

Reported rate is an average rate given by two investigators. <sup>1</sup>Study by Sachinandam, 2012 is not rated because it is a case study

1, Wojnowski, 2005; 2, Weiss, 2006; 3, Blanco, 2008; 4, Rajic, 2009; 5, Rossi, 2009; 6, Blanco, 2012; 7, Kitagawa, 2012; 8, Lubieniecka, 2012; 9, Semsei, 2012; 10, Visscher, 2012; 11, Volkan-Salanci, 2012; 12, Windsor, 2012; 13, Armenian, 2013; 14, Lipshultz, 2013; 15, Lubieniecka, 2013; 16, Visscher, 2013; 17, Vivenza, 2013; 18, Wang, 2014; 19, Wasielewski, 2014; 20, Aminkeng, 2015; 21, Krajcinovic, 2015; 22, Reichwagen, 2015; 23, Visscher, 2015; 24, Vulsteke, 2015; 25, Hertz, 2016; 26, Reinbolt, 2016; 27, Wang, 2016.

A, Rationale of Study; B, Selection and definition of outcome; C, Selection and comparability of comparison groups (0 if not applicable); D, Technical classification of the exposure; E, Non-technical classification of the exposure; F, Other source of bias; G, Sample size and power; H, A priori planning of analyses; I, Statistical methods and control for confounding; J, Testing of assumption & inferences for genetic analyses; K, Appropriateness of inferences drawn from results. <sup>1</sup>G = Study of good quality, M = Study of moderate quality.

**Supplementary Table 2: The quality assessment of reporting in each study (N = 27<sup>1</sup>). (continued)**

| <b>Study</b>         |           |           |           |           |           |           |           |           |           |           |           |           |           |
|----------------------|-----------|-----------|-----------|-----------|-----------|-----------|-----------|-----------|-----------|-----------|-----------|-----------|-----------|
| <b>Item</b>          | <b>15</b> | <b>16</b> | <b>17</b> | <b>18</b> | <b>19</b> | <b>20</b> | <b>21</b> | <b>22</b> | <b>23</b> | <b>24</b> | <b>25</b> | <b>26</b> | <b>27</b> |
| <b>A</b>             | 6         | 5.5       | 6         | 5         | 6.5       | 5.5       | 6         | 6         | 6         | 5.5       | 6         | 6         | 6         |
| <b>B</b>             | 6         | 6         | 6.5       | 5         | 7         | 5         | 5.5       | 6.5       | 6.5       | 5         | 6         | 6         | 6         |
| <b>C</b>             | 0         | 5.5       | 6         | 0         | 7         | 5.5       | 0         | 6         | 6         | 5.5       | 5         | 7         | 7         |
| <b>D</b>             | 6         | 5         | 6         | 3.5       | 6         | 4.5       | 6         | 6         | 6         | 4.5       | 6         | 6         | 6         |
| <b>E</b>             | 5         | 4         | 4         | 4         | 7         | 4.5       | 3         | 2         | 2         | 4.5       | 4         | 6         | 6         |
| <b>F</b>             | 5         | 3.5       | 5         | 4.5       | 6.5       | 4.5       | 5         | 5.5       | 5.5       | 4.5       | 5         | 4         | 5         |
| <b>G</b>             | 3         | 2         | 1         | 2.5       | 1         | 1         | 3         | 1         | 1         | 1         | 4         | 1         | 7         |
| <b>H</b>             | 5         | 5         | 5         | 4.5       | 7         | 5         | 5         | 6.5       | 6.5       | 5         | 6         | 5         | 6         |
| <b>I</b>             | 6         | 6         | 5.5       | 5         | 6.5       | 5.5       | 5.5       | 6         | 6         | 5.5       | 4         | 6         | 7         |
| <b>J</b>             | 5         | 4.5       | 3         | 3.5       | 6         | 4.5       | 5         | 5.5       | 5.5       | 4.5       | 6         | 5         | 6         |
| <b>K</b>             | 5         | 5         | 6.5       | 4         | 6.5       | 6.5       | 6         | 6         | 6         | 6.5       | 6         | 6         | 6         |
| <b>Total scoring</b> | 52        | 52        | 54.5      | 41.5      | 67        | 52        | 50        | 57        | 57        | 52        | 58        | 58        | 68        |
| <b>Quality*</b>      | G         | G         | G         | G         | G         | G         | G         | G         | G         | G         | G         | G         | G         |

Reported rate is an average rate given by two investigators. <sup>1</sup>Study by Sachinandam, 2012 is not rated because it is a case study

1, Wojnowski, 2005; 2, Weiss, 2006; 3, Blanco, 2008; 4, Rajic, 2009; 5, Rossi, 2009; 6, Blanco, 2012; 7, Kitagawa, 2012; 8, Lubieniecka, 2012; 9, Semsei, 2012; 10, Visscher, 2012; 11, Volkan-Salanci, 2012; 12, Windsor, 2012; 13, Armenian, 2013; 14, Lipshultz, 2013; 15, Lubieniecka, 2013; 16, Visscher, 2013; 17, Vivenza, 2013; 18, Wang, 2014; 19, Wasielewski, 2014; 20, Aminkeng, 2015; 21, Krajinovic, 2015; 22, Reichwagen, 2015; 23, Visscher, 2015; 24, Vulsteke, 2015; 25, Hertz, 2016; 26, Reinbolt, 2016; 27, Wang, 2016.

A, Rationale of Study; B, Selection and definition of outcome; C, Selection and comparability of comparison groups (0 if not applicable); D, Technical classification of the exposure; E, Non-technical classification of the exposure; F, Other source of bias; G, Sample size and power; H, A priori planning of analyses; I, Statistical methods and control for confounding; J, Testing of assumption & inferences for genetic analyses; K, Appropriateness of inferences drawn from results. <sup>1</sup>G = Study of good quality, M = Study of moderate quality.

Supplementary Table 3: Genetic polymorphisms, association with ACT and HWE status

| Gene                    | Nucleotide change | Amino acid change | SNP rsID  | Study (Name, Year) | Association <sup>2</sup>                                                                                                                                                    | Deviation from HWE (exact test mid p-value) <sup>1</sup> |
|-------------------------|-------------------|-------------------|-----------|--------------------|-----------------------------------------------------------------------------------------------------------------------------------------------------------------------------|----------------------------------------------------------|
| ABCA1<br>(NC_000009.11) | 106738433G>A      | None              | rs3887137 | Visscher,2015      | <b>SNP is significantly associated with ACT in combined cohort</b><br><b>OR = 2.28 (1.40 – 3.71), p = 9.5x10<sup>-4</sup></b>                                               | No                                                       |
| ABCB1<br>(NC_000007.13) | g.87138532A>C     | None              | rs2235047 | Visscher, 2013     | No significant association between SNP and ACT<br>OR = 1.79 (1.05 – 3.04), p = 0.036                                                                                        | No                                                       |
|                         | g.87138645A>G     | Ile1145           | rs1045642 | Rossi, 2009        | No significant association between genotypes and cardiac toxicity<br>TT vs CT/CC<br>OR = 1.16 (0.73 – 1.84), p = 0.515<br>CT/TT vs CC<br>OR = 1.09 (0.69 – 1.73), p = 0.680 | No                                                       |
|                         |                   |                   |           | Hertz, 2016        | <b>CC vs CT/TT</b><br><b>OR = 0.48 (0.23 – 1.00), p = 0.049</b>                                                                                                             | No                                                       |
|                         | g.87179809C>T     | Ser400Asn         | rs2229109 | Rossi, 2009        | <b>AG vs GG</b><br><b>OR = 1.89 (1.15 – 3.12), p = 0.010</b>                                                                                                                | No                                                       |
|                         | g.87179601A>G     | Gly412            | rs1128503 | Hertz, 2016        | No significant association between genotype and cardiotoxicity<br>GG vs GA/AA<br>OR = 0.57 (0.27 – 1.21), p = 0.14                                                          | No                                                       |
|                         | g.87160618G>T     | Ser893Thr         | rs2032582 |                    | No significant association between genotype and cardiotoxicity<br>GG vs GT/TT<br>OR = 0.72 (0.36 – 1.43), p = 0.35                                                          |                                                          |

Supplementary Table 3: Genetic polymorphisms, association with ACT and HWE status (continued)

| Gene                     | Nucleotide change | Amino acid change | SNP rsID   | Study (Name, Year)  | Association <sup>2</sup>                                                                                                                               | Deviation from HWE (exact test mid p-value) <sup>1</sup> |
|--------------------------|-------------------|-------------------|------------|---------------------|--------------------------------------------------------------------------------------------------------------------------------------------------------|----------------------------------------------------------|
| ABCB4<br>(NC_000007.13)  | g.87073775T>G     | None              | rs1149222  | Visscher, 2012      | <b>Risk variant</b><br><b>OR = 1.87 (1.20 – 2.92), p = 0.0054</b>                                                                                      | No                                                       |
|                          |                   |                   |            | Visscher, 2013      | No significant association between SNP and ACT                                                                                                         | No                                                       |
|                          |                   |                   |            | Hertz, 2016         | OR = 1.36 (0.97 – 1.90), p = 0.075<br>No significant association between genotype and cardiotoxicity<br>TT vs GT/GG                                    | No                                                       |
|                          | g.87105795A>G     | None              | rs4148808  | Sachidanandam, 2012 | OR = 1.06 (0.48 – 2.34), p = 0.14<br>No significant association                                                                                        | NR                                                       |
|                          |                   |                   |            | Visscher, 2013      | <b>SNP is significantly associated with ACT in combined cohort</b><br><b>OR = 1.67 (1.15 – 2.43), p = 0.0073</b>                                       | No                                                       |
|                          |                   |                   |            | Hertz, 2016         | No significant association between genotype and cardiotoxicity<br>GG vs GA/AA                                                                          | No                                                       |
| ABCB11<br>(NC_000002.12) | 169479422A>G      | None              | rs10497346 | Visscher, 2015      | OR = 3.92 (0.34 – 45.39), p = 0.27<br><b>SNP is significantly associated with ACT in combined cohort</b><br><b>OR = 2.23 (1.32 – 3.77), p = 0.0033</b> | No                                                       |



Supplementary Table 3: Genetic polymorphisms, association with ACT and HWE status (continued)

| Gene                    | Nucleotide change | Amino acid change | SNP rsID       | Study (Name, Year)                                                                                                 | Association <sup>2</sup>                                                                                                    | Deviation from HWE (exact test mid p-value) <sup>1</sup> |
|-------------------------|-------------------|-------------------|----------------|--------------------------------------------------------------------------------------------------------------------|-----------------------------------------------------------------------------------------------------------------------------|----------------------------------------------------------|
| ABCC1<br>(NC_000016.10) | g.15983430G>A     | None              | rs215060       | Semsei, 2012                                                                                                       | No significant reduction in LVFS after chemotherapy, p = 0.2                                                                | No                                                       |
|                         | g.15991778T>C     | None              | rs246219       |                                                                                                                    | No significant reduction in LVFS after chemotherapy, p = 0.6                                                                | No                                                       |
|                         | g.16108028G>A     | None              | rs11864374     |                                                                                                                    | No significant reduction in LVFS after chemotherapy, p = 0.2                                                                | No                                                       |
|                         | g.16120105G>A     | None              | rs6416666      |                                                                                                                    | No significant reduction in LVFS after chemotherapy, p = 0.3                                                                | No                                                       |
|                         | g.16141824C>T     | None              | rs3743527      |                                                                                                                    | <b>TT genotype is associated with lower mean LVFS, p = 0.001</b>                                                            | No                                                       |
|                         | g.16044465T>C     | Val275=           | rs246221       | Semsei, 2012                                                                                                       | <b>TT/TC genotypes are associated with lower mean LVFS, p = 0.027</b>                                                       | No                                                       |
|                         |                   |                   |                | Vulsteke, 2015                                                                                                     | <b>SNP is associated with an asymptomatic LVEF decline &gt; 10%, p = 0.038</b>                                              | No                                                       |
|                         | g16079375G>T      | Gly671Val         | rs45511401     | Semsei, 2012                                                                                                       | No significant reduction in LVFS after chemotherapy, p = 0.3                                                                | No                                                       |
|                         |                   |                   |                | Reichwagen, 2015                                                                                                   | No significant association between genotypes and cardiotoxicity<br>GG vs GT/TT<br>OR = 0.7 (0.2 – 2.5), p = 0.632           | No                                                       |
|                         |                   |                   |                | Wojnowski, 2005                                                                                                    | <b>GT/TT genotypes are associated with acute cardiotoxicity (p = 0.005) and chronic or acute cardiotoxicity (p = 0.029)</b> | No (0.14)                                                |
| g.6093318C>T            | None              | rs4148358         | Semsei, 2012   | No significant reduction in LVFS after chemotherapy, p = 0.3                                                       | No                                                                                                                          |                                                          |
| g.16076620G>T           | None              | rs4148350         | Visscher, 2012 | <b>Risk variant</b><br><b>OR = 2.40 (1.33 – 4.33), p = 0.0040</b>                                                  | No                                                                                                                          |                                                          |
|                         |                   |                   | Hertz, 2016    | No significant association between genotype and cardiotoxicity<br>GG vs GT/TT<br>OR = 0.93 (0.21 – 4.04), p = 0.92 | No                                                                                                                          |                                                          |

Supplementary Table 3: Genetic polymorphisms, association with ACT and HWE status (continued)

| Gene                    | Nucleotide change | Amino acid change | SNP rsID  | Study (Name, Year) | Association <sup>2</sup>                                                                                                                     | Deviation from HWE (exact test mid p-value) <sup>1</sup> |
|-------------------------|-------------------|-------------------|-----------|--------------------|----------------------------------------------------------------------------------------------------------------------------------------------|----------------------------------------------------------|
| ABCC2<br>(NC_000010.10) | g.101611294G>A    | Cys1515Tyr        | rs8187710 | Armenian, 2013     | <b>At risk genotype GA/AA</b><br><b>OR = 5.44 (1.92 – 13.84)</b><br><b>FDR-adjusted p = 0.02</b>                                             | No                                                       |
|                         |                   |                   |           | Wojnowski, 2005    | No significant association between GA/AA genotypes and cardiotoxicity, p = 0.05                                                              | No                                                       |
|                         |                   |                   |           | Reichwagen, 2015   | No significant association between genotypes and cardiotoxicity<br>GG vs GA/AA<br>OR = 1.3 (0.4 – 3.95), p = 0.669                           | No                                                       |
|                         | T>A               | Val1188Glu        | rs8187694 | Visscher, 2012     | No significant association<br>p = 0.90                                                                                                       | No                                                       |
|                         |                   |                   |           | Reichwagen, 2015   | No significant association between genotypes and cardiotoxicity<br>TT vs TA/AA<br>OR = 1.1 (0.4 – 3.4), p = 0.822                            | No                                                       |
|                         |                   |                   |           | Wojnowski, 2005    | <b>TA/AA genotypes are associated with chronic or acute cardiotoxicity, p = 0.05</b>                                                         | No                                                       |
|                         |                   |                   |           | Rossi, 2009        | No significant association between genotypes and cardiac toxicity<br>AT/AA vs TT<br>OR = 0.85 (0.50 – 1.43), p = 0.546                       | Yes                                                      |
| ABCC5<br>(NC_000003.11) | g.183737356A>T    | None              | rs7627754 | Krajcinovic, 2015  | <b>Homozygote variant vs heterozygote + homozygote wt, EF reduction of 12%: p &lt; 0.0005 and SF reduction of 8%: p = 0.001 using t-test</b> | NR                                                       |
| ABCC6<br>(NC_000016.10) | g.16150272T>C     | None              | rs212097  | Semsei, 2012       | No significant reduction in LVFS after chemotherapy, p = 0.2                                                                                 | No                                                       |

**Supplementary Table 3: Genetic polymorphisms, association with ACT and HWE status (continued)**

| Gene                    | Nucleotide change | Amino acid change | SNP rsID    | Study (Name, Year) | Association <sup>2</sup>                                                                                                      | Deviation from HWE (exact test mid p-value) <sup>1</sup> |
|-------------------------|-------------------|-------------------|-------------|--------------------|-------------------------------------------------------------------------------------------------------------------------------|----------------------------------------------------------|
| ABCC9<br>(NG_000012.11) | g.22017395G>C     | Pro739Ala         | rs201223488 | Wasielweski, 2014  | No causal relation between mutation and development of anthracycline-associated cardiomyopathy                                | No                                                       |
|                         | 21908424G>C       | None              | rs11046217  | Visscher, 2015     | <b>SNP is significantly associated with ACT in combined cohort</b><br><b>OR = 2.67 (1.50 – 4.76), p = 9.9x10<sup>-4</sup></b> | No                                                       |
| ABCC10<br>(NC_00006.11) | 43468329A>G       | None              | rs1214763   | Visscher, 2015     | Yes <b>SNP is significantly associated with ACT in combined cohort</b><br><b>OR = 0.43 (0.24 – 0.79), p = 0.0035</b>          | No                                                       |
| ABCG2<br>(NC_000004.11) | g.89052323G>T     | Gln141Lyn         | rs2231142   | Rossi, 2009        | No significant association between genotypes and cardiac toxicity<br>AC/AA vs CC<br>OR = 1.05 (0.70 – 1.57), p = 0.784        | No                                                       |
|                         | g.89061114C>T     | Val12Met          | rs2231137   |                    | AG/AA vs GG<br>OR = 1.01 (0.56 – 1.80), p = 0.974                                                                             | No                                                       |
| ACE<br>(NC_000017.10)   | Ins/Del           | -                 | rs4340      | Vivenza, 2013      | Del/Del + Del/Ins vs Ins/Ins, p = 0.37<br>using Fischer's exact test                                                          | No                                                       |
|                         | g.61566031G>A     | Thr202            | rs4343      | Armenian, 2013     | At risk genotype AG/GG<br>OR = 1.28 (0.67 – 2.45)<br>FDR-adjusted p = 0.72                                                    | No                                                       |
| ADH7<br>(NC_000004.11)  | g.100333267G>A    | None              | rs729147    | Visscher, 2013     | <b>SNP is significantly associated with ACT in combined cohort</b><br><b>OR = 1.43 (1.02 – 2.01), p = 0.041</b>               | No                                                       |
| ADRB2<br>(NC_000005.10) | g.148206440G>A    | Gly16Arg          | rs1042713   | Armenian, 2013     | At risk genotype GG<br>OR = 0.60 (0.31 – 1.20)<br>FDR-adjusted p = 0.35                                                       | No                                                       |

Supplementary Table 3: Genetic polymorphisms, association with ACT and HWE status (continued)

| Gene                     | Nucleotide change | Amino acid change | SNP rsID   | Study (Name, Year) | Association <sup>2</sup>                                                                                   | Deviation from HWE (exact test mid p-value) <sup>1</sup> |
|--------------------------|-------------------|-------------------|------------|--------------------|------------------------------------------------------------------------------------------------------------|----------------------------------------------------------|
| AGT<br>(NC_000001.10)    | g.230845977G>A    | Thr174Met         | rs4672     | Vivenza, 2013      | Homozygote variant vs heterozygote + homozygote wt, p = 0.70 using Pearson's chi-square test               | No                                                       |
|                          | g.230845794A>G    | Met235Thr         | rs699      | Vivenza, 2013      | Homozygote variant + heterozygote vs homozygote wt, p = 0.31 using Fischer's exact test                    | No                                                       |
|                          |                   |                   |            | Armenian, 2013     | At risk genotype GA/AA<br>OR = 1.15 (0.57 – 2.30)<br>FDR-adjusted p = 0.88                                 | No                                                       |
| AGTR1<br>(NC_000003.11)  | g.148459988A>C    | None              | rs5186     | Vivenza, 2013      | Homozygote variant + heterozygote vs homozygote wt, p = 0.31 using Pearson's chi-square test               | No                                                       |
|                          |                   |                   |            | Armenian, 2013     | At risk genotype CA/AA<br>OR = 0.68 (0.37 – 1.25)<br>FDR-adjusted p = 0.88                                 | No                                                       |
| AKR1A1<br>(NC_000001.10) | g.46032311A>G     | Asn52Ser          | rs2229540  | Lubieniecka, 2012  | No significant association, p = 0.1667                                                                     | No                                                       |
| AKR1C4<br>(NC_000010.10) | g.5260682C>G      | Leu311Val         | rs17134592 | Lubieniecka, 2012  | No significant association, p = 0.9556                                                                     | No                                                       |
|                          | g.5244295G>A      | None              | rs7083869  | Lubieniecka, 2013  | <b>SNP is associated with LVEF drop<br/>p = 0.0045</b>                                                     | No                                                       |
|                          | g.5244441A>G      | None              | rs2151896  |                    | <b>SNP is associated with LVEF drop<br/>p = 0.045</b>                                                      | No                                                       |
| AKR7A2<br>(NC_000001.10) | g.19635011C>T     | Ala142Thr         | rs1043657  | Lubieniecka, 2012  | No significant association, p = 0.4379                                                                     | No                                                       |
| CAT<br>(NC_000011.10)    | g.34438684C>T     | None              | rs1001179  | Rajic, 2009        | No significant correlation between SNP and late cardiac damage<br>OR = 3.222 (0.341 – 30.426)<br>p = 0.307 | NR                                                       |
|                          | g.34439157C>T     | None              | rs10836235 |                    | <b>Heterozygote is correlated with late cardiac damage<br/>OR = 0.284 (0.093 – 0.867), p = 0.020</b>       | NR                                                       |

Supplementary Table 3: Genetic polymorphisms, association with ACT and HWE status (continued)

| Gene                  | Nucleotide change | Amino acid change | SNP rsID | Study (Name, Year)  | Association <sup>2</sup>                                                                                                                   | Deviation from HWE (exact test mid p-value) <sup>1</sup> |
|-----------------------|-------------------|-------------------|----------|---------------------|--------------------------------------------------------------------------------------------------------------------------------------------|----------------------------------------------------------|
| CBR1<br>(NC_000021.9) | g.37445313G>A     | None              | rs9024   | Blanco, 2012        | AA/GA vs GG<br>OR = (0.45 – 1.47), p = 0.49                                                                                                | No                                                       |
|                       |                   |                   |          | Hertz, 2016         | No significant association between genotype and cardiotoxicity<br>GG vs GA/AA<br>OR = 0.45 (0.10 – 2.04), p = 0.30                         | No                                                       |
|                       |                   |                   |          | Reinbolt, 2016      | No significant different between major allele (G) and minor allele (A), p = 0.480<br>No significant different between genotypes, p = 0.261 | NR                                                       |
|                       |                   |                   |          | Sachidonandam, 2012 | No significant association                                                                                                                 | NR                                                       |
|                       |                   |                   |          | Armenian, 2013      | At risk genotype GG<br>OR = 1.51 (0.76 – 3.03)<br>FDR-adjusted p = 0.46                                                                    | No                                                       |

Supplementary Table 3: Genetic polymorphisms, association with ACT and HWE status (continued)

| Gene                  | Nucleotide change | Amino acid change | SNP rsID  | Study (Name, Year)   | Association <sup>2</sup>                                                                                                                    | Deviation from HWE (exact test mid p-value) <sup>1</sup> |
|-----------------------|-------------------|-------------------|-----------|----------------------|---------------------------------------------------------------------------------------------------------------------------------------------|----------------------------------------------------------|
| CBR3<br>(NC_000021.8) | g.37518706G>A     | Val244Met         | rs1056892 | Blanco, 2008         | GG vs AA<br>OR = 5.63 (0.80 – 39.57), p = 0.083<br>GA vs AA<br>OR = 3.66 (0.64 – 21.07), p = 0.15<br>No significant association, p = 0.6988 | No                                                       |
|                       |                   |                   |           | Lubieniecka, 2012    | No significant association, p = 0.6988                                                                                                      | No                                                       |
|                       |                   |                   |           | Armenian, 2013       | At risk genotype GG<br>OR = 1.08 (0.59 – 1.87)<br>FDR-adjusted p = 0.88                                                                     | No                                                       |
|                       |                   |                   |           | Visscher, 2015       | No significant association between SNP and ACT<br>OR = 0.93, p = 0.67                                                                       | No                                                       |
|                       |                   |                   |           | Blanco, 2012         | <b>AA/GA vs GG</b><br><b>OR = 1.79 (1.08 – 2.96), p = 0.02</b>                                                                              | No                                                       |
|                       |                   |                   |           | Volkan-Salanci, 2012 | Presence of A allele is associated with deterioration in cardiac function.                                                                  | No                                                       |
|                       |                   |                   |           | Hertz, 2016          | <b>AA vs GA/GG</b><br><b>OR = 6.19 (0.08 – 19.76), p = 0.002</b><br><b>GG vs GA/AA</b><br><b>OR = 2.50 (1.22 – 5.11), p = 0.012</b>         | No                                                       |
|                       |                   |                   |           | Reinbolt, 2016       | No significant different between major allele (G) and minor allele (A), p = 0.395<br>No significant different between genotypes, p = 0.556  | NR                                                       |
|                       |                   |                   |           | Lubieniecka, 2012    | No significant association, p = 0.7788                                                                                                      | No                                                       |
|                       |                   |                   |           | Lubieniecka, 2013    | <b>SNP is associated with LVEF drop</b><br><b>p = 0.0045</b>                                                                                | No                                                       |

Supplementary Table 3: Genetic polymorphisms, association with ACT and HWE status (continued)

| Gene                     | Nucleotide change | Amino acid change | SNP rsID  | Study (Name, Year) | Association <sup>2</sup>                                                                                                                                                                    | Deviation from HWE (exact test mid p-value) <sup>1</sup> |
|--------------------------|-------------------|-------------------|-----------|--------------------|---------------------------------------------------------------------------------------------------------------------------------------------------------------------------------------------|----------------------------------------------------------|
| CELF4<br>(NC_000018.10)  | g.37497065G>A     | None              | rs1786814 | Wang, 2016         | <b>GG genotype is associated with anthracycline-related cardiomyopathy</b><br><b>OR = 10.16 (3.8 – 27.3), p &lt; 0.001 at cumulative anthracycline exposure of &gt; 300mg/m<sup>2</sup></b> | No                                                       |
| COL1A2<br>(NC_000007.13) | g.93881175C>G     | Pro549Ala         | rs42524   | Visscher, 2015     | <b>SNP is significantly associated with ACT in combined cohort</b><br><b>OR = 1.79 (1.24 – 2.57), p = 0.0020</b>                                                                            | No                                                       |
| CYBA<br>(NC_000016.10)   | 242C>T            | His72Tyr          | rs4673    | Visscher, 2012     | No significant association<br>p = 0.63                                                                                                                                                      | No                                                       |
|                          |                   |                   |           | Reichwagen, 2015   | No significant association between genotypes and cardiotoxicity CC vs CT/TT<br>OR = 1.8 (0.9 – 3.6), p = 0.090                                                                              | No                                                       |
|                          |                   |                   |           | Hertz, 2016        | No significant association between genotype and cardiotoxicity GG vs GA/AA<br>OR = 1.31 (0.66 – 2.59), p = 0.45                                                                             | No                                                       |
|                          |                   |                   |           | Wojnowski, 2005    | <b>CT/TT genotypes are associated with chronic or acute cardiotoxicity, p = 0.01</b>                                                                                                        | No                                                       |
|                          |                   |                   |           | Rossi, 2009        | <b>TT vs CT/CC</b><br><b>OR = 1.86 (1.15 – 2.99), p = 0.010</b>                                                                                                                             | No                                                       |
|                          |                   |                   |           | Armenian, 2013     | At risk genotype GA/AA<br>OR = 1.29 (0.72 – 2.44)<br>FDR-adjusted p = 0.65                                                                                                                  | No                                                       |
| CYP1A2<br>(NC_000015.10) | g.74746892T>G     | None              | rs2069522 | Lubieniecka, 2013  | <b>SNP is associated with LVEF drop</b><br><b>p = 0.004</b>                                                                                                                                 | No                                                       |
|                          | g.74749000T>G     | None              | rs2069526 |                    | <b>SNP is associated with LVEF drop</b><br><b>p = 0.0045</b>                                                                                                                                | No                                                       |
|                          | g.74753351T>C     | None              | rs4646427 |                    | <b>SNP is associated with LVEF drop</b><br><b>p = 0.0045</b>                                                                                                                                | No                                                       |

**Supplementary Table 3: Genetic polymorphisms, association with ACT and HWE status (continued)**

| Gene                      | Nucleotide change | Amino acid change | SNP rsID   | Study (Name, Year) | Association <sup>2</sup>                                                                                           | Deviation from HWE (exact test mid p-value) <sup>1</sup> |
|---------------------------|-------------------|-------------------|------------|--------------------|--------------------------------------------------------------------------------------------------------------------|----------------------------------------------------------|
| CYP2B6<br>(NC_000019.10)  | g.41023115G>A     | None              | rs7255904  | Lubieniecka, 2013  | <b>SNP is associated with LVEF drop<br/>p = 0.0475</b>                                                             | No                                                       |
| CYP2F1<br>(NC_000019.10)  | g.41113670T>C     | None              | rs1709115  | Lubieniecka, 2013  | <b>SNP is associated with LVEF drop<br/>p = 0.042</b>                                                              | No                                                       |
| CYP2J2<br>(NC_000001.10)  | 60087084A>C       | None              | rs2294950  | Visscher, 2015     | <b>SNP is significantly associated with ACT in combined cohort<br/>OR = 0.39 (0.21 – 0.74), p = 0.0014</b>         | No                                                       |
| CYP3A4<br>(NC_000007.13)  | g.99366316G>A     | None              | rs35599367 | Hertz, 2016        | No significant association between genotype and cardiotoxicity<br>GG vs GA/AA<br>OR = 0.65 (0.09 – 4.73), p = 0.67 | No                                                       |
| CYP3A5<br>(NC_000007.13)  | g.99270539C>T     | None              | rs776746   | Hertz, 2016        | No significant association between genotype and cardiotoxicity<br>GG vs GA/AA<br>OR = 2.17 (0.80 – 5.94), p = 0.13 | No                                                       |
| CYP4B1<br>(NC_000001.10)  | g.47265776A>G     | None              | rs837400   | Lubieniecka, 2013  | <b>SNP is associated with LVEF drop<br/>p = 0.021</b>                                                              | No                                                       |
|                           | g.47283505G>T     | None              | rs4646495  |                    | <b>SNP is associated with LVEF drop<br/>p = 0.041</b>                                                              | No                                                       |
| CYP4F11<br>(NC_000019.10) | g.15906807G>A     | None              | rs8112732  | Lubieniecka, 2013  | <b>SNP is associated with LVEF drop<br/>p = 0.0235</b>                                                             | No                                                       |
|                           | g.15912567A>G     | None              | rs12610962 |                    | <b>SNP is associated with LVEF drop<br/>p = 0.028</b>                                                              | No                                                       |
|                           | g.15913964A>G     | None              | rs2072270  |                    | <b>SNP is associated with LVEF drop<br/>p = 0.0285</b>                                                             | No                                                       |
|                           | g.15921833A>C     | None              | rs11086012 |                    | No significant associated between SNP and LVEF drop, p = 0.051                                                     | No                                                       |
|                           | g.15906196G>A     | None              | rs2108623  | Visscher, 2013     | No significant association between SNP and ACT<br>OR = 0.77 (0.57 – 1.04), p = 0.084                               | No                                                       |
| CYP11B2<br>(NC_000008.10) | g.143999600A>G    | None              | rs1799998  | Vivenza, 2013      | Homozygote variant + heterozygote vs homozygote wt, p = 0.31 using Fischer's exact test                            | No                                                       |



**Supplementary Table 3: Genetic polymorphisms, association with ACT and HWE status (continued)**

| Gene                    | Nucleotide change | Amino acid change | SNP rsID  | Study (Name, Year) | Association <sup>2</sup>                                                                                              | Deviation from HWE (exact test mid p-value) <sup>1</sup> |
|-------------------------|-------------------|-------------------|-----------|--------------------|-----------------------------------------------------------------------------------------------------------------------|----------------------------------------------------------|
| FMO2<br>(NC_000001.10)  | 37236730T>A       | Asp36Gly          | rs2020870 | Visscher, 2012     | <b>Protective variant</b><br><b>OR = 0.14 (0.03 – 0.59), p = 4.2x10<sup>-4</sup></b>                                  | No                                                       |
| FMO3<br>(NC_000001.10)  | g.171080080G>A    | Val257Met         | rs1736557 | Visscher, 2013     | <b>SNP is significantly associated with ACT in combined cohort</b><br><b>OR = 0.47 9 0.25 – 0.87), p = 0.011</b>      | No                                                       |
| GPX3<br>(NC_000005.10)  | 150395291G>C      | None              | rs2233302 | Visscher, 2015     | <b>SNP is significantly associated with ACT in combined cohort</b><br><b>OR = 0.40 (0.22 – 0.73), p = 0.0011</b>      | No                                                       |
| GSTA1<br>(NC_000006.11) | NR                | NR                | NR        | Weiss, 2006        | No significant associations between genotype and cardiac events                                                       | No (0.34)                                                |
| GSTA2<br>(NC_000006.11) | 52725690C>G       | Ser112Thr         | rs2180314 | Visscher, 2015     | <b>SNP is significantly associated with ACT in combined cohort</b><br><b>OR = 0.62 (0.45 – 0.86), p = 0.0036</b>      | No                                                       |
| GSTM1<br>(NC_000001.10) | NA                | NA                | NA        | Weiss, 2006        | No significant associations between genotype and cardiac events                                                       | NR                                                       |
|                         | NA                | NA                | NA        | Rajic, 2009        | No significant correlation between SNP and late cardiac damage<br>OR = 1.089 (0.312 – 3.798)<br>p = 0.895             | NR                                                       |
|                         | NA                | NA                | NA        | Rossi, 2009        | No significant association between genotypes and cardiac toxicity<br>Null vs wt<br>OR = 0.92 (0.62 – 1.36), p = 0.681 | No                                                       |
|                         | NA                | NA                | NA        | Vivenza, 2013      | Present (+/- and +/+) vs Null (-/-), p = 0.147 using Fisher's exact test                                              | Yes                                                      |
| GSTT1<br>(NC_000022.10) | NA                | NA                | NA        | Weiss, 2006        | No significant associations between genotype and cardiac events                                                       | NR                                                       |
|                         | NA                | NA                | NA        | Rajic, 2009        | No significant correlation between SNP and late cardiac damage<br>OR = 6.222 (0.726 – 53.348)<br>p = 0.063            | NR                                                       |
|                         | NA                | NA                | NA        | Vivenza, 2013      | Present (+/- and +/+) vs Null (-/-), p = 0.687 using Fisher's exact test                                              | Yes                                                      |

Supplementary Table 3: Genetic polymorphisms, association with ACT and HWE status (continued)

| Gene                    | Nucleotide change | Amino acid change | SNP rsID   | Study (Name, Year)   | Association <sup>2</sup>                                                                                                | Deviation from HWE (exact test mid p-value) <sup>1</sup> |
|-------------------------|-------------------|-------------------|------------|----------------------|-------------------------------------------------------------------------------------------------------------------------|----------------------------------------------------------|
| GSTM3<br>(NC_000001.11) | 110075064 A>G     | None              | rs12059276 | Visscher, 2015       | <b>SNP is significantly associated with ACT in combined cohort</b><br><b>OR = 0.36 (0.17 – 0.76), p = 0.0031</b>        | No                                                       |
| GSTP1<br>(NC_000011.10) | g.67585218A>G     | Ile105Val         | rs1695     | Volkan-Salanci, 2012 | Presence of G allele is associated with deterioration in cardiac function.                                              | No                                                       |
|                         |                   |                   |            | Rossi, 2009          | <b>GG vs AG/AA</b><br><b>OR = 1.83 (1.12 – 3.01), p = 0.015</b>                                                         | No                                                       |
|                         |                   |                   |            | Windsor, 2012        | <b>Variants are associated with increased risk of cardiotoxicity</b><br><b>OR = 4.8 (1.4 – 16.4), p = 0.011</b>         | No                                                       |
|                         |                   |                   |            | Vivenza, 2013        | Homozygote variant + heterozygote vs homozygote wt, p = 0.20 using Pearson's chi-square test                            | Yes                                                      |
|                         | g.67586108C>T     | Ala114Val         | rs1138272  | Rossi, 2009          | No significant association between genotypes and cardiac toxicity<br>CT vs CC<br>OR = 0.99 (0.52 – 1.87), p = 0.978     | No                                                       |
| HAS3<br>(NC_000016.10)  | g.69109674A>C     | Ala93=            | rs2232228  | Wang, 2014           | <b>Presence of allele A increase the risk of cardiomyopathy with the increase of cumulative anthracycline exposure.</b> | No                                                       |

Supplementary Table 3: Genetic polymorphisms, association with ACT and HWE status (continued)

| Gene                      | Nucleotide change | Amino acid change | SNP rsID            | Study (Name, Year)                                                                                               | Association <sup>2</sup>                                                                                                      | Deviation from HWE (exact test mid p-value) <sup>1</sup> |
|---------------------------|-------------------|-------------------|---------------------|------------------------------------------------------------------------------------------------------------------|-------------------------------------------------------------------------------------------------------------------------------|----------------------------------------------------------|
| HFE<br>(NC_000006.11)     | g.26093141G>A     | Cys282Tyr         | rs1800562           | Armenian, 2013                                                                                                   | At risk genotype GA/AA<br>OR = 0.30 (0.05 – 1.23)<br>FDR-adjusted p = 0.28                                                    | No                                                       |
|                           |                   |                   |                     | Lipshultz, 2013                                                                                                  | <b>Heterozygote is associated with multiple elevations in cTnT concentration</b><br><b>OR = 7.23 (1.78 – 29.4), p = 0.006</b> | NR                                                       |
| HNMT<br>(NC_000002.11)    | g.26091179C>G     | His63Asp          | rs1799945           | Armenian, 2013                                                                                                   | <b>At risk genotype CG/GG</b><br><b>OR = 2.58 (1.27 – 5.20)</b><br><b>FDR-adjusted p = 0.03</b>                               | No                                                       |
|                           |                   |                   |                     | Lipshultz, 2013                                                                                                  | No association between heterozygote or homozygote with cardiac markers                                                        | NR                                                       |
|                           | g.13876039C>A     | None              | rs17583889          | Visscher, 2012                                                                                                   | <b>Risk variant</b><br><b>OR = 1.91 (1.21 – 3.02), p = 0.0057</b>                                                             | No                                                       |
|                           |                   |                   |                     | Visscher, 2013                                                                                                   | <b>SNP is significantly associated with ACT in combined cohort</b><br><b>OR = 1.67 (1.15 – 2.41), p = 0.0073</b>              | No                                                       |
| g.138780932T>C            | None              | rs17645700        | Sachidanandan, 2012 | Presence of homozygote variant (high risk) and heterozygote (intermediate risk)                                  | NR                                                                                                                            |                                                          |
|                           |                   |                   | Visscher, 2013      | <b>SNP is significantly associated with ACT in combined cohort</b><br><b>OR = 0.56 (0.37 – 0.86), p = 0.0054</b> | No                                                                                                                            |                                                          |
| HSD17B2<br>(NC_000016.10) | g.82028304T>G     | None              | rs16956248          | Lubieniecka, 2013                                                                                                | <b>SNP is associated with LVEF drop</b><br><b>p = 0.023</b>                                                                   | No                                                       |
|                           | g.820829177T>A    | None              | rs13333826          |                                                                                                                  | <b>SNP is associated with LVEF drop</b><br><b>p = 0.024</b>                                                                   | No                                                       |
|                           | g.82054058C>T     | None              | rs7196087           |                                                                                                                  | <b>SNP is associated with LVEF drop</b><br><b>p = 0.028</b>                                                                   | No                                                       |
|                           | g.82079586C>T     | None              | rs2955159           |                                                                                                                  | <b>SNP is associated with LVEF drop</b><br><b>p = 0.028</b>                                                                   | No                                                       |
|                           | g.82072694G>A     | None              | rs2966245           |                                                                                                                  | <b>SNP is associated with LVEF drop</b><br><b>p = 0.0305</b>                                                                  | No                                                       |

Supplementary Table 3: Genetic polymorphisms, association with ACT and HWE status (continued)

| Gene                     | Nucleotide change | Amino acid change | SNP rsID  | Study (Name, Year)     | Association <sup>2</sup>                                                                                                             | Deviation from HWE (exact test mid p-value) <sup>1</sup> |
|--------------------------|-------------------|-------------------|-----------|------------------------|--------------------------------------------------------------------------------------------------------------------------------------|----------------------------------------------------------|
| HSD17B4<br>(NC_000005.9) | g.119502865G>T    | None              | rs257970  | Lubieniecka,<br>2013   | <b>SNP is associated with LVEF drop<br/>p = 0.003</b>                                                                                | No                                                       |
|                          | g.119502373G>A    | None              | rs2636968 |                        | <b>SNP is associated with LVEF drop<br/>p = 0.007</b>                                                                                | No                                                       |
| NCF4<br>(NC_000022.10)   | g.37256846GA>G    | None              | rs1883112 | Visscher,<br>2012      | No significant association, p = 0.76                                                                                                 | No                                                       |
|                          |                   |                   |           | Hertz, 2016            | No significant association between<br>genotype and cardiotoxicity<br>AA vs GA/GG<br>OR = 1.44 (0.51 – 4.07), p = 0.49                | No                                                       |
|                          |                   |                   |           | Reichwagen,<br>2015    | No significant association between<br>genotypes and cardiotoxicity<br>GG/GA vs AA<br>OR = 0.6 (0.3 – 1.4), p = 0.280                 | No                                                       |
|                          |                   |                   |           | Armenian,<br>2013      | At risk genotype AA<br>OR = 0.06 (0.54 – 2.13)<br>FDR-adjusted p = 0.88                                                              | No                                                       |
|                          |                   |                   |           | Rossi, 2009            | <b>AG/GG vs AA</b><br><b>OR = 0.39 (0.24 – 0.64), p = 1.4x10<sup>-4</sup></b>                                                        | No                                                       |
|                          |                   |                   |           | Wojnowski,<br>2005     | <b>AA genotype is associated with<br/>chronic cardiotoxicity (p = 0.013)<br/>and chronic or acute cardiotoxicity<br/>(p = 0.031)</b> | No                                                       |
|                          |                   |                   |           | NOS3<br>(NC_000007.13) | g.150696111T>G                                                                                                                       | p.Asp298Glu                                              |
| NQO1<br>(NC_000016.9)    | g.69745145C>T     | Pro187Ser         | rs1800566 | Armenian,<br>2013      | At risk genotype CT/CC<br>OR = 0.88 (0.23 – 3.42)<br>FDR-adjusted p = 0.88                                                           | No                                                       |
|                          |                   |                   |           | Blanco, 2008           | CC vs TT<br>OR = 1.26 (0.14 – 11.39), p = 0.84<br>CT vs TT<br>OR = 0.65 (0.06 – 6.77), p = 0.72                                      | No                                                       |

Supplementary Table 3: Genetic polymorphisms, association with ACT and HWE status (continued)

| Gene                    | Nucleotide change | Amino acid change | SNP rsID   | Study (Name, Year) | Association <sup>2</sup>                                                                                           | Deviation from HWE (exact test mid p-value) <sup>1</sup> |
|-------------------------|-------------------|-------------------|------------|--------------------|--------------------------------------------------------------------------------------------------------------------|----------------------------------------------------------|
| NR1I2<br>(NC_000003.11) | g.119501039C>A    | None              | rs1523127  | Hertz, 2016        | No significant association between genotype and cardiotoxicity<br>TT vs TG/GG<br>OR = 0.76 (0.37 – 1.54), p = 0.44 | No                                                       |
|                         | g.119530858G>A    | None              | rs3732357  |                    | No significant association between genotype and cardiotoxicity<br>AA vs GA/GG<br>OR = 1.44 (0.76 – 2.70), p = 0.26 | No                                                       |
|                         | g.119499507T>C    | None              | rs1523130  |                    | No significant association between genotype and cardiotoxicity<br>GG vs GA/AA<br>OR = 1.11 (0.57 – 2.17), p = 0.76 | No                                                       |
| POR<br>(NC_000007.13)   | g.75589903A>G     | None              | rs2868177  | Lubieniecka, 2013  | <b>SNP is associated with LVEF drop<br/>p = 0.0025</b>                                                             | No                                                       |
|                         | g.75606109G>A     | None              | rs13240755 |                    | <b>SNP is associated with LVEF drop<br/>p = 0.0035</b>                                                             | No                                                       |
|                         | g.75607608C>T     | None              | rs4732513  |                    | <b>SNP is associated with LVEF drop<br/>p = 0.004</b>                                                              | No                                                       |
|                         | g.75601169G>A     | None              | rs6953065  |                    | SNP is associated with LVEF drop<br>p = 0.0445                                                                     | No                                                       |

Supplementary Table 3: Genetic polymorphisms, association with ACT and HWE status (continued)

| Gene                      | Nucleotide change | Amino acid change | SNP rsID   | Study (Name, Year) | Association <sup>2</sup>                                                                                            | Deviation from HWE (exact test mid p-value) <sup>1</sup> |
|---------------------------|-------------------|-------------------|------------|--------------------|---------------------------------------------------------------------------------------------------------------------|----------------------------------------------------------|
| RAC2<br>(NC_000022.11)    | g.37236730T>A     | None              | rs13058338 | Armenian, 2013     | At risk genotype TA/AA<br>OR = 2.61 (1.46 – 4.69)<br>FDR-adjusted p = 0.02                                          | No                                                       |
|                           |                   |                   |            | Wojnowski, 2005    | TA/AA genotypes are associated with acute cardiotoxicity (p = 0.005) and chronic or acute cardiotoxicity (p = 0.04) | No (0.95)                                                |
|                           |                   |                   |            | Rossi, 2009        | AA vs AT/TT<br>OR = 1.84 (1.10 – 3.10), p = 0.019                                                                   | No                                                       |
|                           |                   |                   |            | Reichwagen, 2015   | No significant association between genotypes and cardiotoxicity<br>GG vs GT/TT<br>OR = 0.7 (0.2 – 2.5), p = 0.632   | No                                                       |
|                           |                   |                   |            | Hertz, 2016        | No significant association between genotype and cardiotoxicity<br>TT vs TA/AA<br>OR = 1.8 (0.9 – 3.7), p = 0.077    | No                                                       |
|                           |                   |                   |            | Visscher, 2012     | No significant association<br>p = 0.13                                                                              |                                                          |
| RARG<br>(NC_000012.11)    | g.53605545G>A     | Ser4271Leu        | rs2229774  | Aminkeng, 2015     | All population OR 4.7 (2.7-8.3), p = 4.3 x 10 <sup>-11</sup>                                                        | No                                                       |
| SERPINA6<br>(NC_000014.8) | 93848406G>A       | None              | rs10144771 | Visscher, 2015     | SNP is significantly associated with ACT in combined cohort<br>OR = 1.72 (1.19 – 2.50), p = 0.0042                  | No                                                       |
| SLC10A2<br>(NC_000013.10) | g.103714254G>A    | None              | rs9514091  | Visscher, 2012     | Protective variant<br>OR = 0.43 (0.23 – 0.78), p = 0.0033                                                           | No                                                       |
|                           |                   |                   |            | Visscher, 2013     | SNP is significantly associated with ACT in combined cohort<br>OR = 0.57 (0.38 – 0.87)                              | No                                                       |
|                           |                   |                   |            | Visscher, 2013     | SNP is significantly associated with ACT in combined cohort<br>OR = 0.66 (0.47 – 0.93), p = 0.016                   | No                                                       |

**Supplementary Table 3: Genetic polymorphisms, association with ACT and HWE status (continued)**

| Gene                       | Nucleotide change | Amino acid change | SNP rsID   | Study (Name, Year) | Association <sup>2</sup>                                                                                           | Deviation from HWE (exact test mid p-value) <sup>1</sup> |
|----------------------------|-------------------|-------------------|------------|--------------------|--------------------------------------------------------------------------------------------------------------------|----------------------------------------------------------|
| SLC13A3<br>(NC_000020.10)  | 44693250A>G       | None              | rs2425886  | Visscher, 2015     | <b>SNP is significantly associated with ACT in combined cohort</b><br><b>OR = 1.75 (1.20 – 2.57), p = 0.0037</b>   | No                                                       |
| SLC15A1<br>(NC_000013.10)  | 98153602G>C       | None              | rs8001466  | Visscher, 2015     | <b>SNP is significantly associated with ACT in combined cohort</b><br><b>OR = 2.02 (1.25 – 3.26), p = 0.0042</b>   | No                                                       |
| SLC22A2<br>(NC_000006.11)  | g.160670282A>C    | Ser270Ala         | rs316019   | Visscher, 2013     | No significant association between SNP and ACT<br>OR = 0.75 (0.46 – 1.21), p = 0.23                                | No                                                       |
| SLC22A7<br>(NC_000006.12)  | 43389166A>G       | None              | rs4149178  | Visscher, 2015     | <b>SNP is significantly associated with ACT in combined cohort</b><br><b>OR = 0.45 (0.26 – 0.75) p = 0.0013</b>    | No                                                       |
| SLC22A16<br>(NC_000006.11) | g.110778128T>C    | His49Arg          | rs714368   | Hertz, 2016        | No significant association between genotype and cardiotoxicity<br>AA vs GA/GG<br>OR = 0.78 (0.31 – 1.96), p = 0.60 | No                                                       |
|                            | g.110777962A>G    | Asn104            | rs6907567  |                    | No significant association between genotype and cardiotoxicity<br>AA vs GA/GG<br>OR = 0.74 (0.30 – 1.83), p = 0.51 | No                                                       |
|                            | g.110763875A>G    | Val252Ala         | rs723685   |                    | No significant association between genotype and cardiotoxicity<br>TT vs TC/CC<br>OR = 0.44 (0.10 – 2.03), p = 0.29 | No                                                       |
|                            | g.110760008A>G    | Met377Thr         | rs12210538 |                    | No significant association between genotype and cardiotoxicity<br>AA vs GA/GG<br>OR = 1.30 (0.63 – 2.71), p = 0.48 | No                                                       |

**Supplementary Table 3: Genetic polymorphisms, association with ACT and HWE status (continued)**

| Gene                      | Nucleotide change | Amino acid change | SNP rsID   | Study (Name, Year) | Association <sup>2</sup>                                                                                                        | Deviation from HWE (exact test mid p-value) <sup>1</sup> |
|---------------------------|-------------------|-------------------|------------|--------------------|---------------------------------------------------------------------------------------------------------------------------------|----------------------------------------------------------|
| SLC22A17<br>(NC_000014.8) | 22884409G>A       | None              | rs4982753  | Visscher, 2015     | <b>SNP is significantly associated with ACT in combined cohort</b><br><b>OR = 0.50 (0.33 – 0.75), p = 4.4x10<sup>-4</sup></b>   | No                                                       |
|                           | 23814995A>T       | None              | rs11625724 |                    | <b>SNP is significantly associated with ACT in combined cohort</b><br><b>OR = 1.63 (0.0020)</b>                                 | No                                                       |
|                           | 23812237G>C       | None              | rs12882406 |                    | <b>SNP is significantly associated with ACT after adjusting the effect of rs4982753 OR = 1.52, p = 0.042</b>                    | No                                                       |
|                           | 23816998T>C       | None              | rs12896494 |                    | <b>SNP is significantly associated with ACT after adjusting the effect of rs4982753 OR = 0.65, p = 0.031</b>                    | No                                                       |
| SLC28A1<br>(NC_000015.10) | g.84909044T>C     | None              | rs2305364  | Visscher, 2013     | <b>SNP is significantly associated with ACT in combined cohort</b><br><b>OR = 1.60 (1.18 – 2.17), p = 0.0020</b>                | No                                                       |
|                           | g.84904404A>C     | None              | rs2290271  | Visscher, 2013     | <b>SNP is significantly associated with ACT in combined cohort</b><br><b>OR = 0.66 (0.48 – 0.91)</b>                            | No                                                       |
| SLC28A3<br>(NC_000009.11) | g.86900926G>A     | Leu461=           | rs7853758  | Visscher, 2012     | <b>Protective variant</b><br><b>OR = 0.31 (0.16 – 0.60), p = 1.0x10<sup>-4</sup></b>                                            | No                                                       |
|                           |                   |                   |            | Visscher, 2013     | <b>SNP is significantly associated with ACT in combined cohort</b><br><b>OR = 0.36 (0.22 – 0.60), p = 1.6 x 10<sup>-5</sup></b> | No                                                       |
|                           |                   |                   |            | Reichwagen, 2015   | No significant association between genotypes and cardiotoxicity<br>GG vs GA/AA<br>OR = 1.4 (0.7 – 3.0), p = 0.393               | No                                                       |
|                           |                   |                   |            | Hertz, 2016        | No significant association between genotype and cardiotoxicity<br>GG vs GA/AA<br>OR = 0.55 (0.16 – 1.91), p = 0.35              | No                                                       |



**Supplementary Table 3: Genetic polymorphisms, association with ACT and HWE status (continued)**

| Gene                      | Nucleotide change | Amino acid change | SNP rsID   | Study (Name, Year) | Association <sup>2</sup>                                                                                                      | Deviation from HWE (exact test mid p-value) <sup>1</sup> |
|---------------------------|-------------------|-------------------|------------|--------------------|-------------------------------------------------------------------------------------------------------------------------------|----------------------------------------------------------|
| SLC28A3<br>(NC_000009.11) | g.86946417A>C     | None              | rs4877847  | Visscher, 2012     | <b>Protective variant</b><br><b>OR = 0.60 (0.41 – 0.89), p = 0.0092</b>                                                       | No                                                       |
|                           |                   |                   |            | Visscher, 2013     | <b>SNP is significantly associated with ACT in combined cohort</b><br><b>OR = 0.73 (0.54 – 0.98), p = 0.037</b>               | No                                                       |
|                           | g.86909550G>A     | None              | rs885004   | Visscher, 2013     | <b>SNP is significantly associated with ACT in combined cohort</b><br><b>OR = 0.34 (0.20 – 0.60), p = 3.0x10<sup>-5</sup></b> | No                                                       |
| SLCO4C1<br>(NC_000005.10) | g.101633540G>A    | None              | rs2600834  | Visscher, 2015     | <b>SNP is significantly associated with ACT in combined cohort</b><br><b>OR = 1.80 (1.26 – 2.57), p = 0.0011</b>              | No                                                       |
| SLCO6A1<br>(NC_000005.10) | g.101779552A>G    | None              | rs12658397 | Visscher, 2015     | <b>SNP is significantly associated with ACT in combined cohort</b><br><b>OR = 1.68 (1.20 – 2.35), p = 0.0025</b>              | No                                                       |
| SOD2<br>(NC_000006.11)    | g.159981080G>A    | None              | rs7754103  | Visscher, 2015     | <b>SNP is significantly associated with ACT in combined cohort</b><br><b>OR = 0.32 (0.15 – 0.72), p = 0.0024</b>              | No                                                       |
|                           |                   |                   |            | g.160113872A>G     | Val16Ala                                                                                                                      | rs4880                                                   |
|                           |                   |                   |            | Armenian, 2013     | At risk genotype GA/AA<br>OR = 1.79 (0.90 – 3.38)<br>FDR-adjusted p = 0.28                                                    | No                                                       |
| SPG7<br>(NC_000016.10)    | g.89549357T>G     | None              | rs2019604  | Visscher, 2012     | <b>Protective variant</b><br><b>OR = 0.39 (0.20 – 0.76), p = 0.0021</b>                                                       | No                                                       |
|                           |                   |                   |            | Visscher, 2013     | <b>SNP is significantly associated with ACT in combined cohort</b><br><b>OR = 0.56 (0.35 – 0.90), p = 0.012</b>               | No                                                       |

**Supplementary Table 3: Genetic polymorphisms, association with ACT and HWE status (continued)**

| Gene                      | Nucleotide change | Amino acid change | SNP rsID    | Study (Name, Year) | Association <sup>2</sup>                                                                                                                                                  | Deviation from HWE (exact test mid p-value) <sup>1</sup> |
|---------------------------|-------------------|-------------------|-------------|--------------------|---------------------------------------------------------------------------------------------------------------------------------------------------------------------------|----------------------------------------------------------|
| SULT2B1<br>(NC_000019.10) | g.48588977C>A     | None              | rs10426377  | Visscher, 2013     | <b>SNP is significantly associated with ACT in combined cohort</b><br><b>OR = 0.56 (0.38 – 0.81), p = 0.0015</b>                                                          | No                                                       |
|                           | 48589173A>G       |                   | rs10426628  | Visscher, 2015     | <b>SNP is significantly associated with ACT in combined cohort</b><br><b>OR = 1.92 (1.34 – 2.73), p = 3.2x10<sup>-4</sup></b>                                             | No                                                       |
| TOP2B<br>(NC_000003.11)   | g.24929802C>A     | None              | rs10865801  | Hertz, 2016        | No significant association between genotype and cardiotoxicity<br>CC vs CT/TT<br>OR = 1.32 (0.67 – 2.61), p = 0.43                                                        | No                                                       |
| TP53<br>(NC_000017.10)    | g.757972G>C       | Pro72Arg          | rs1042522   | Rossi, 2009        | No significant association between genotypes and cardiac toxicity<br>CG/CC vs GG<br>OR = 1.20 (0.81 – 1.78), p = 0.357                                                    | No                                                       |
|                           |                   |                   |             | Vivenza, 2013      | Homozygote variant + heterozygote vs homozygote wt, p = 0.33 using Pearson's chi-square test                                                                              | Yes                                                      |
| UGT1A6<br>(NC_000002.11)  | g.234601669T>G    | Ser7Ala           | rs6759892   | Visscher, 2012     | <b>Risk variant</b><br><b>OR = 1.77 (1.20 – 2.61), p = 0.0038</b>                                                                                                         | No                                                       |
|                           |                   |                   |             | Visscher, 2013     | <b>SNP is significantly associated with ACT in combined cohort</b><br><b>OR = 1.43 (1.05 – 1.94), p = 0.022</b>                                                           | No                                                       |
|                           | g.234602277G>T    | Val209=           | rs17863783  | Visscher, 2013     | <b>SNP is significantly associated with ACT in combined cohort</b><br><b>OR = 4.30 (1.97 – 9.36), p = 2.4x10<sup>-4</sup></b>                                             | No                                                       |
|                           | g.234593117G>T    | None              | rs4261716   | Hertz, 2016        | Only homozygote wt were presence                                                                                                                                          | No                                                       |
| DSG2<br>(NC_000018.10)    | g.31521193T>G     | Val158Gly         | rs191143292 | Wasielewski, 2014  | <b>SNP is significantly associated with ACT in combined cohort</b><br><b>OR = 1.44 (1.06 – 1.95), p = 0.018</b><br>No causal relation between mutation and cardiomyopathy | No                                                       |

**Supplementary Table 3: Genetic polymorphisms, association with ACT and HWE status (continued)**

| Gene                   | Nucleotide change | Amino acid change | SNP rsID    | Study (Name, Year) | Association <sup>2</sup>                                                                                                                                       | Deviation from HWE (exact test mid p-value) <sup>1</sup> |
|------------------------|-------------------|-------------------|-------------|--------------------|----------------------------------------------------------------------------------------------------------------------------------------------------------------|----------------------------------------------------------|
| JUP<br>(NC_000017.10)  | g.39913771C>T     | Val648Ile         | rs143043662 | Wasielewski, 2014  | No causal relation between mutation and cardiomyopathy                                                                                                         | No                                                       |
| VCL<br>(NC_000010.10)  | g.75873961C>T     | Ala990Val         | rs150595117 | Wasielewski, 2014  | No causal relation between mutation and cardiomyopathy                                                                                                         | No                                                       |
| MYH7<br>(NC_000014.8)  | NR                | Asp(545, 955)Asn  | NR          | Wasielewski, 2014  | No causal relation between mutation and cardiomyopathy                                                                                                         | No                                                       |
|                        | NR                | Tyr1375           | NR          |                    | No causal relation between mutation and cardiomyopathy                                                                                                         | No                                                       |
| TTN<br>(NC_000002.11)  | NR                | Ser31346Leu       | NR          | Wasielewski, 2014  | No causal relation between mutation and cardiomyopathy                                                                                                         | No                                                       |
|                        | g.179602871T>C    | Tyr4453Cys        | rs371552518 |                    | No causal relation between mutation and cardiomyopathy                                                                                                         | No                                                       |
|                        | NR                | Glu10855dup       | NR          |                    | No causal relation between mutation and cardiomyopathy                                                                                                         | No                                                       |
| DSP<br>(NC_000006.11)  | NR                | Arg1425Lys        | NR          | Wasielewski, 2014  | No causal relation between mutation and cardiomyopathy                                                                                                         | No                                                       |
| PKP2<br>(NC_000012.11) | g.32994058A>C     | Ile531Ser         | rs147240502 | Wasielewski, 2014  | No causal relation between mutation and cardiomyopathy                                                                                                         | No                                                       |
| XDH<br>(NC_000002.11)  | g.31460174G>A     | Val279            | rs4407290   | Visscher, 2015     | <b>SNP is significantly associated with ACT in combined cohort</b>                                                                                             | No                                                       |
|                        | g.31460632A>G     | None              | rs2236168   |                    | <b>OR = 0.18 (0.04 – 0.79), p = 0.0039</b><br><b>SNP is significantly associated with ACT in combined cohort</b><br><b>OR = 1.68 (1.21 – 2.34), p = 0.0017</b> | No                                                       |

FDR, false discovery rate; HWE, Hardy-Weinberg Equilibrium; NR, not reported

<sup>1</sup>In studies that had not reported for HWE testing we used the BGI Cognitive Genomics (available at <https://www.cog-genomics.org/software/stats-to-test-for-the-deviation>). A mid p-value of less than 0.05 is considered statistical deviation from HWE.

<sup>2</sup>Significant associations are in bold (p<0.05)
